# Supplementary material
Source: HighWire-hosted journal article supplement (https://erj.ersjournals.com/content/56/1/1902135)
Supplement: inline-supplementary-material-2 [file inline-supplementary-material-2.pdf]

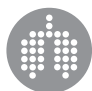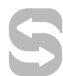

SHAREABLE PDF

# Pleuroparenchymal fibroelastosis in systemic sclerosis: prevalence and prognostic impact

Martina Bonifazi<sup>1,2,3</sup>, Nicola Sverzellati<sup>4</sup>, Eva Negri<sup>5</sup>, Joseph Jacob<sup>6,7</sup>, Ryoko Egashira<sup>8</sup>, Joanna Moser<sup>9</sup>, Sara Piciucchi<sup>10</sup>, Federico Mei<sup>2</sup>, Angelo De Lauretis<sup>3,11</sup>, Dina Visca<sup>3,12</sup>, Nicole Goh<sup>13,14</sup>, Matteo Bonini<sup>15,16</sup>, Laura Cirilli<sup>1</sup>, Carlo La Vecchia<sup>17</sup>, Felix Chua<sup>3</sup>, Vasileios Kouranos<sup>3</sup>, George Margaritopoulos<sup>3,18</sup>, Maria Kokosi<sup>3</sup>, Toby M. Maher<sup>3</sup>, Stefano Gasparini<sup>1,2</sup>, Armando Gabrielli<sup>19</sup>, Athol U. Wells<sup>3</sup> and Elisabetta A. Renzoni<sup>3</sup>

**Affiliations:** <sup>1</sup>Dept of Biomedical Sciences and Public Health, Università Politecnica delle Marche, Ancona, Italy. <sup>2</sup>Pulmonary Disease Unit, Dept of Internal Medicine, Azienda Ospedali Riuniti, Ancona, Italy. <sup>3</sup>Interstitial Lung Disease Unit, Royal Brompton Hospital, Imperial College, London, UK. <sup>4</sup>Radiology, Dept of Medicine and Surgery, Università di Parma, Parma, Italy. <sup>5</sup>Dept of Biomedical and Clinical Sciences "Luigi Sacco", Università degli Studi di Milano, Milan, Italy. <sup>6</sup>Dept of Respiratory Medicine, University College London, London, UK. <sup>7</sup>Centre for Medical Image Computing, University College London, London, UK. <sup>8</sup>Dept of Radiology, Faculty of Medicine, Saga University, Saga city, Japan. <sup>9</sup>Dept of Radiology, St George's University Hospitals NHS Foundation Trust, London, UK. <sup>10</sup>Radiology Unit, Ospedale GB Morgagni, Forlì, Italy. <sup>11</sup>Pulmonary Diseases Unit, Azienda Ospedaliera "Guido Salvini", Garbagnate Milanese, Italy. <sup>12</sup>Division of Pulmonary Rehabilitation, Istituti Clinici Scientifici Maugeri, IRCCS, Tradate, Italy. <sup>13</sup>Dept of Respiratory Medicine, Austin Hospital, Melbourne, Australia. <sup>14</sup>Institute for Breathing and Sleep, Melbourne, Australia. <sup>15</sup>National Heart and Lung Institute (NHLI), Imperial College London and Royal Brompton Hospital, London, UK. <sup>16</sup>Dept of Cardiovascular and Thoracic Sciences, Fondazione Policlinico Universitario A.Gemelli-IRCCS, Università Cattolica del Sacro Cuore, Rome, Italy. <sup>17</sup>Dept of Clinical Sciences and Community Health, University of Milan, Milan, Italy. <sup>18</sup>Interstitial Lung Disease Unit, Manchester University Hospital NHS FT, Wythenshawe Hospital, Manchester, UK. <sup>19</sup>Dept of Clinical and Molecular Sciences, Università Politecnica delle Marche, Ancona, Italy.

**Correspondence:** Martina Bonifazi, Dept of Biomedical Sciences and Public Health, Università Politecnica delle Marche, Via Tronto 10/a, Ancona, Italy. E-mail: bonifazimarti@gmail.com

@ERSpublications

**We provide a thorough assessment of pleuroparenchymal fibroelastosis (PPFE) prevalence, severity and clinical impact in two large cohorts of scleroderma patients (total n=359). PPFE was present in 18% of patients and independently predicted mortality.** <https://bit.ly/2xDVvG3>

**Cite this article as:** Bonifazi M, Sverzellati N, Negri E, *et al.* Pleuroparenchymal fibroelastosis in systemic sclerosis: prevalence and prognostic impact. *Eur Respir J* 2020; 56: 1902135 [https://doi.org/10.1183/13993003.02135-2019].

This single-page version can be shared freely online.

**ABSTRACT** Interstitial lung disease (ILD) in systemic sclerosis (SSc) is a major cause of morbidity and mortality, mostly presenting as non-specific interstitial pneumonia. Little is known about the prevalence of pleuroparenchymal fibroelastosis (PPFE), a specific entity affecting the visceral pleura and subpleural parenchyma. We set out to estimate PPFE prevalence in two large cohorts of SSc patients and to assess its impact on survival and functional decline.

A total of 359 SSc patients, derived from two referral centres in two different countries (UK and Italy), were included. The first available high-resolution computed tomography scan was independently evaluated by two radiologists blind to clinical information, to quantify ILD extent, freestanding bronchial

abnormalities, and lobar percentage involvement of PPFE on a four-point categorical scale. Discordant scores were adjudicated by a third scorer. PPFE extent was further classified as limited ( $\leq 2/18$ ) or extensive ( $> 2/18$ ). Results were evaluated against functional decline and mortality.

The overall prevalence of PPFE in the combined SSc population was 18% (11% with extensive PPFE), with no substantial difference between the two cohorts. PPFE was significantly linked to free-standing bronchial abnormalities (61% *versus* 25% in PPFE *versus* no PPFE;  $p < 0.0001$ ) and to worse survival, independently of ILD severity or short-term lung function changes (HR 1.89, 95% CI 1.10–3.25;  $p = 0.005$ ).

In the current study, we provide an exhaustive description of PPFE prevalence and clinical impact in the largest cohort of SSc subjects published so far. PPFE presence should be carefully considered, due to its significant prognostic implications.
